# Supplementary material for: Feedback control of Swe1p degradation in the yeast morphogenesis checkpoint
Source: PubMed Central journal article supplement — Mol Biol Cell. 2013 Apr 1;24(7):914–22. doi: 10.1091/mbc.E12-11-0812 (PMC3608501; doi:10.1091/mbc.e12-11-0812), 2013-04-01
Supplement: supp_E12-11-0812v1_CombinedSupMats.pdf [file supp_E12-11-0812v1_CombinedSupMats.pdf]

**Video4. GFP-Hsl7p is not displaced from the septin scaffold following osmotic shock.**

Time-lapse imaging at 3 min intervals of cells marked with GFP-Hsl7p (DLY15839) or Hog1p-GFP (DLY15123) as indicated, in a microfluidic device. Media was switched to contain 0.4 M NaCl at 30 min. Hog1p-GFP (bottom) rapidly translocated into the nucleus and gradually returned to the cytoplasm as cells adapted to the stress. GFP-Hsl7p (top) remained at the bud neck throughout.
